# Supplementary material for: Large-scale assessment of oxic methane production in lakes using an isotopic mass balance approach
Source: Research Square preprint supplement (doi:10.21203/rs.3.rs-7889423/v1), 2025-10-24
Supplement: Supplementary file 1 [file 251e0e998837735795cc9e69.pdf]

## Supplement information

### **Large-scale assessment of oxic methane production in lakes using an isotopic mass balance approach**

#### **Authors and Affiliations**

Jihyeon Kim<sup>\*1</sup>, Bruno Cremella<sup>2</sup>, Yannick Huot<sup>2</sup>, and Yves T. Prairie<sup>1</sup>

<sup>1</sup> Département des sciences biologiques, Université du Québec à Montréal, Canada

<sup>2</sup> Département de géomatique appliquée, Université de Sherbrooke, Sherbrooke, Canada

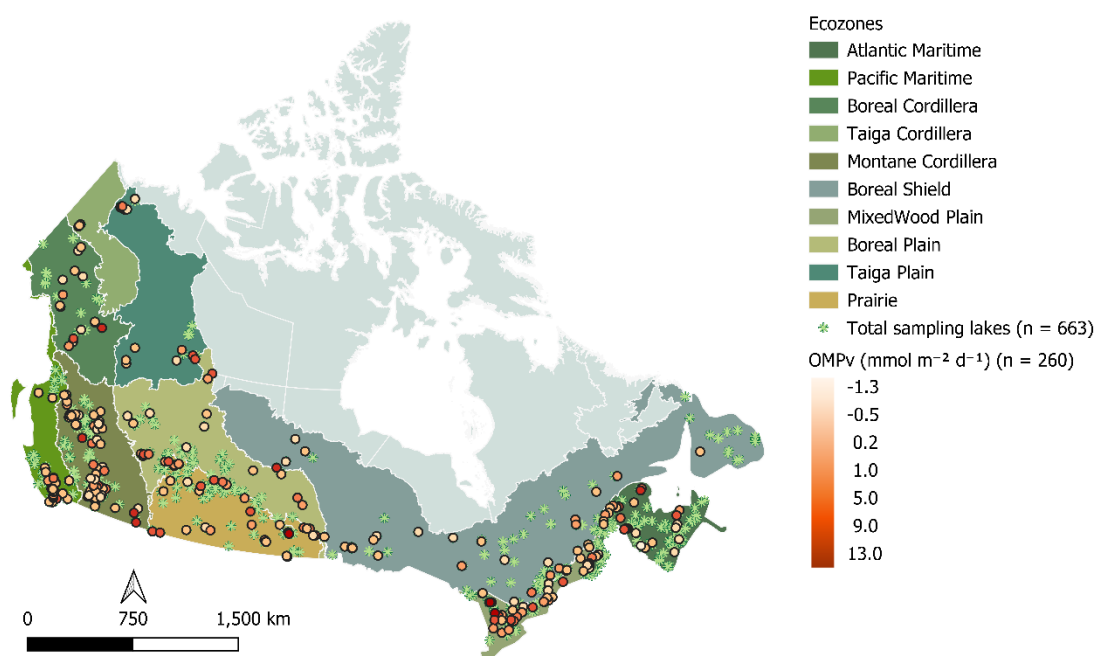

11

12 **Supplementary Fig. 1** | Map of sampling lakes, covering 10 provinces and 2 territories (42°N to 69°N and

13 52°W to 141°W) across Canada. As part of the national-scale lakes assessment (NSERC Lake Pulse

14 Project), a total of 663 lakes were sampled over three summers (2017 to 2019). Among them, OMPv rates

15 were estimated in 260 lakes with complete CH<sub>4</sub>-related measurements using our extended mass balance

16 approach.

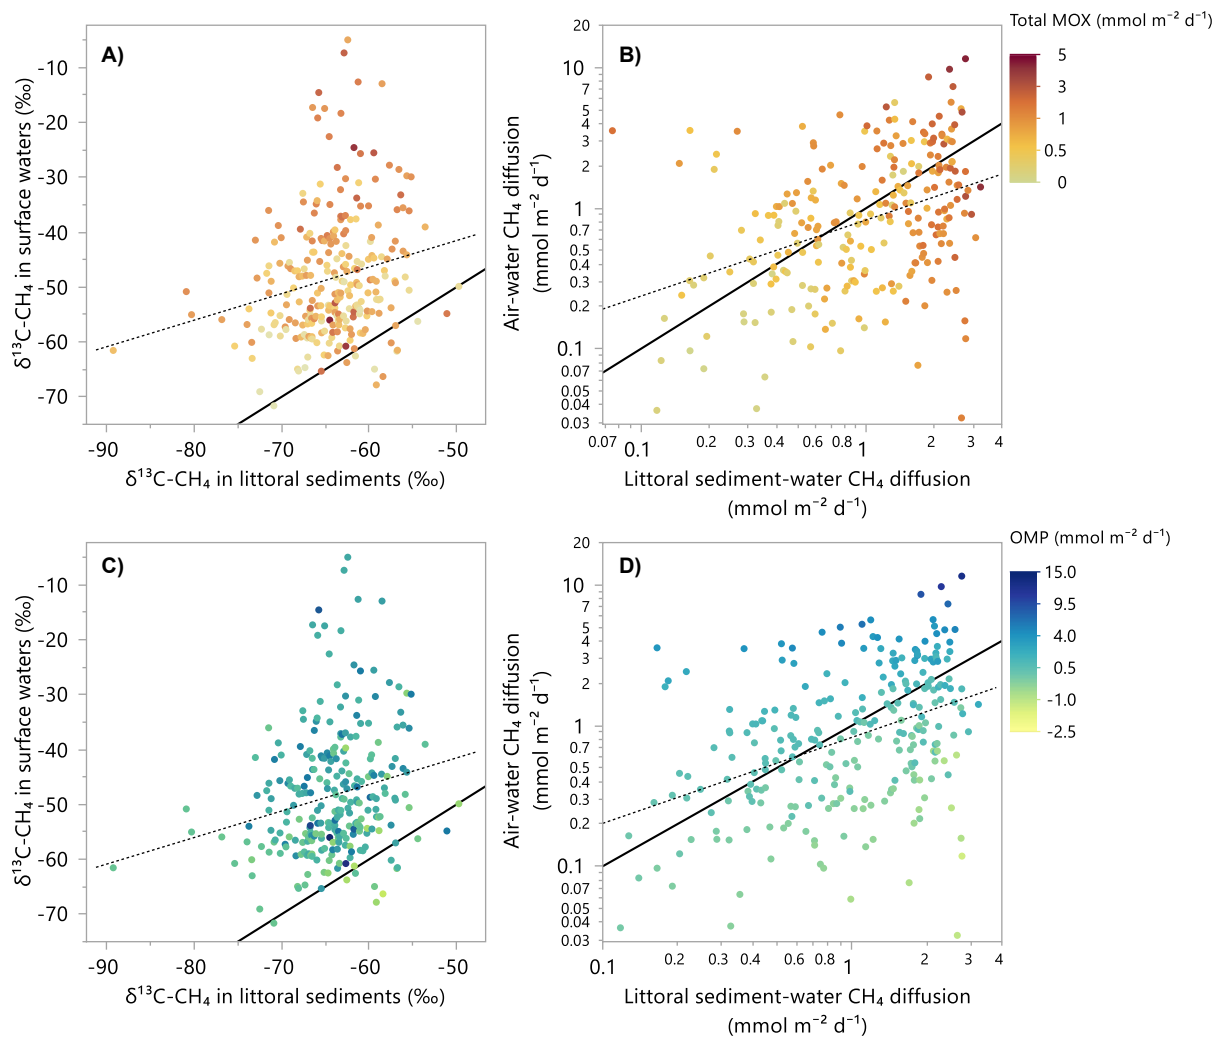

17

18 **Supplementary Fig. 2** | In line with Fig 1 of main context, our mass balance-based estimates of **A)** total  
 19 MOX and **B)** OMP further elucidate the quantitative mechanisms underlying the interplay between OMP  
 20 and total MOX as a key control on diffusive  $\text{CH}_4$  emissions to the atmosphere, beyond littoral sediment  
 21 inputs.

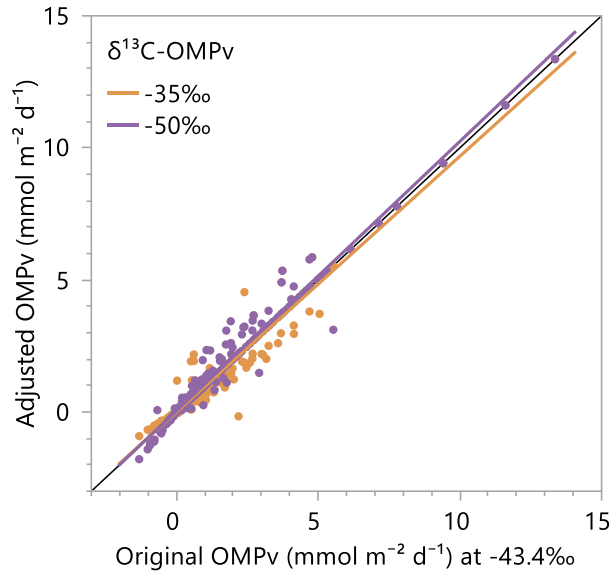

22

23 **Supplementary Fig. 3** | Sensitivity analysis of our mass balance to potential variability in  $\delta^{13}\text{C}_{\text{OMP}_V}$ . The x-  
 24 axis shows  $\text{OMP}_V$  estimates assuming  $\delta^{13}\text{C}_{\text{OMP}_V} = -43.4\text{‰}$  (literature average), while the y-axis shows  
 25 corresponding estimates when  $\delta^{13}\text{C}_{\text{OMP}_V}$  is adjusted to  $-35\text{‰}$  and  $-50\text{‰}$ , respectively. The black line  
 26 indicates the 1:1 line, while colored lines represent fitted regression line.

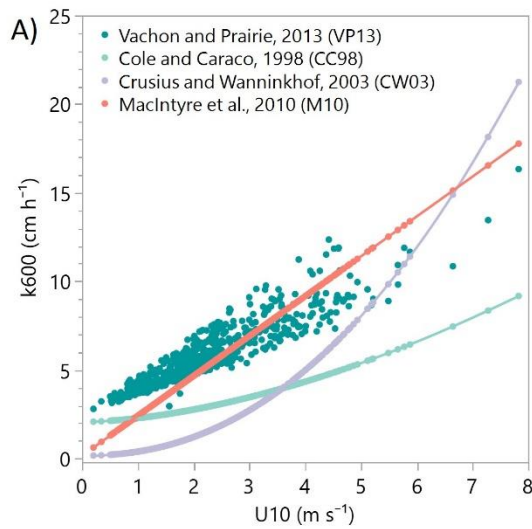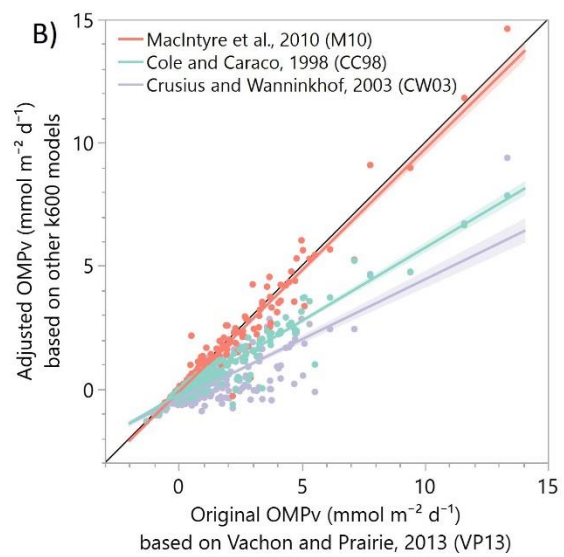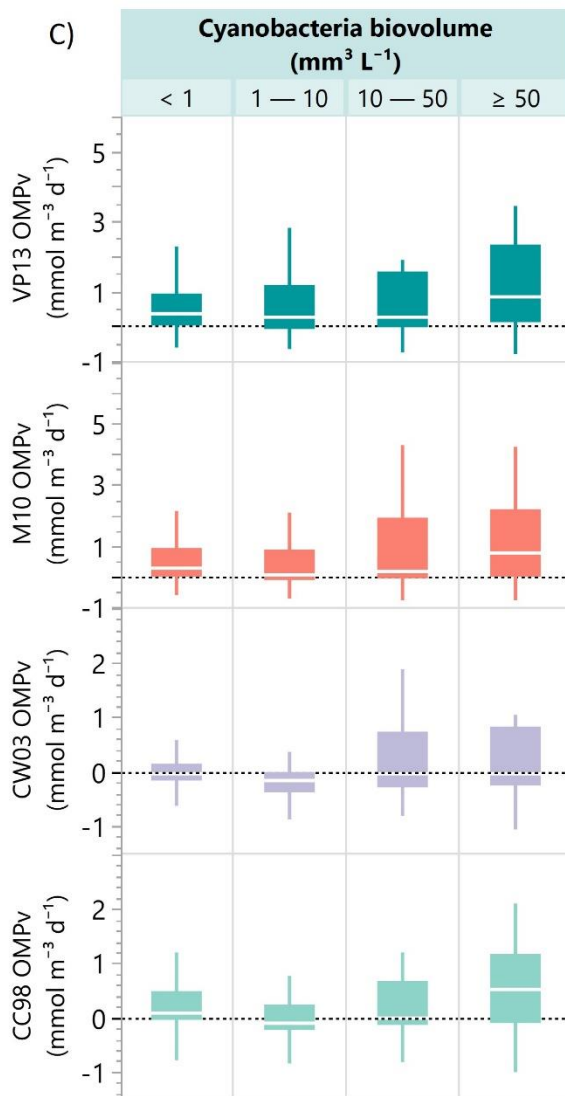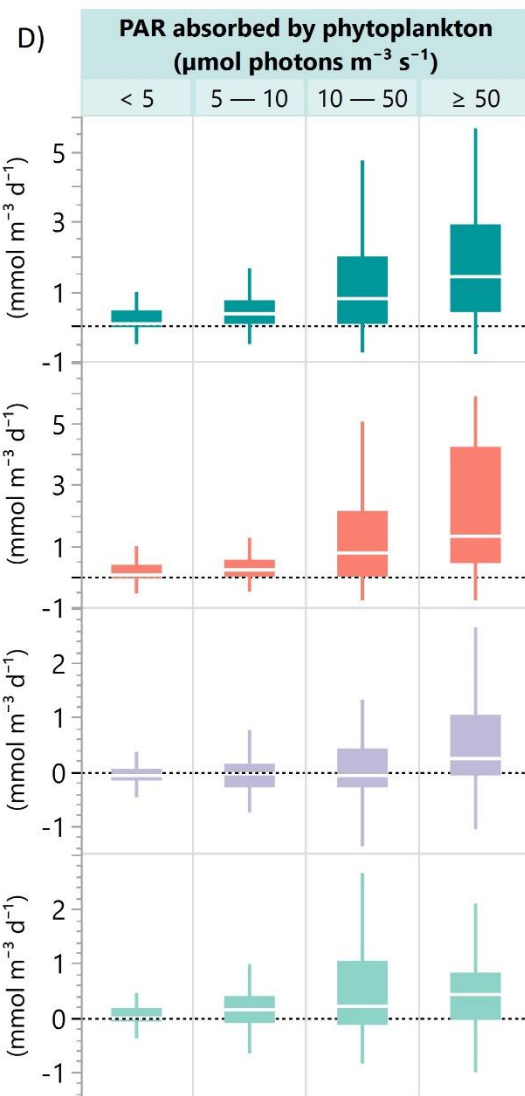

**Supplementary Fig. 4 |** Sensitivity analysis of our mass balance to potential variability in  $k_{600}$  models for AWD. **A)** The x-axis shows the average wind speeds at 10 m, and the y-axis shows the corresponding  $k_{600}$  derived from four different models: MacIntyre et al. (2010; based on eddy covariance estimates, mixed buoyancy-derived), Cole and Caraco (1998), and Crusius and Wanninkhof (2003) (both derived from wind speed based on  $\text{SF}_6$  tracer experiments). The colored lines represent smoother fits **B)** The x-axis shows  $OMP_V$  estimates in this study using the  $k_{600}$  model derived from Vachon and Prairie (2013; based on lake size and wind speed). The y-axis shows estimates adjusted using the three alternative models. The black line indicates the 1:1 line, while colored lines represent fitted regression lines. **C)** Boxplots illustrate the variability in  $OMP_V$  derived from each model as a function of total biomass volume of cyanobacteria, and **D)** as a function of PAR absorbed by cyanobacteria and algae. Boxes show the 1<sup>st</sup> and 3<sup>rd</sup> quartile with the median (white line), whiskers extend to most extreme data point within 1.5 times the IQR from the box.

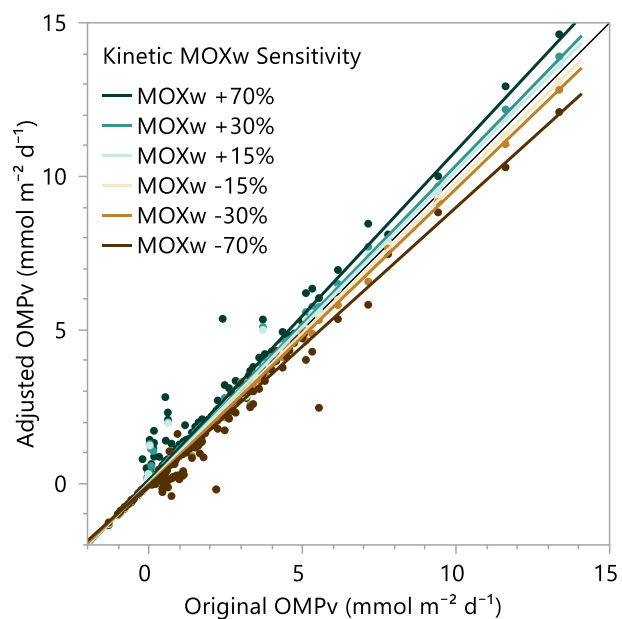

**Supplementary Fig. 5** | Sensitivity analysis of our mass balance to potential variability in  $MOX_w$ . The x-axis shows  $OMP_v$  estimates assuming  $MOX_w$  derived from aerobic oxidation kinetics that integrate the effects of surface  $CH_4$ ,  $O_2$ , and temperature, following Thottathil et al. (2019), while the y-axis shows corresponding estimates when  $MOX_w$  is adjusted to  $\pm 15\%$ ,  $\pm 30\%$ , and  $\pm 70\%$ , respectively. The black line indicates the 1:1 line, while colored lines represent fitted regression line.

47

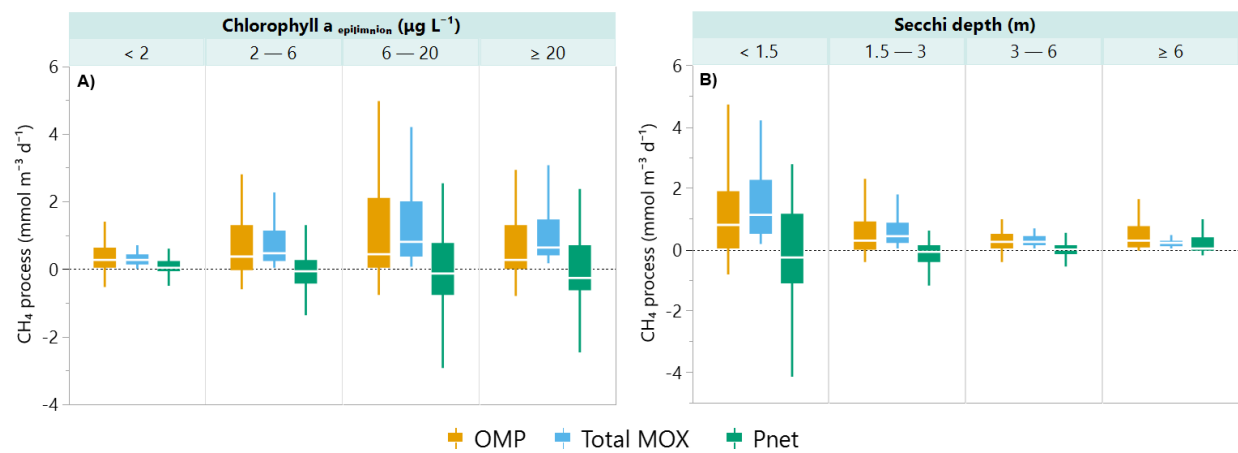

48

49 **Supplementary Fig. 6** | Boxplots illustrate the variability in **OMP<sub>v</sub>**, total MOX (as sum of **MOX<sub>s</sub>** and **MOX<sub>w</sub>**),  
50 and **P<sub>net</sub>** (all rates are normalized to surface-water volume) as a function of **A**) chlorophyll a (in µg L<sup>-1</sup>) and  
51 **B**) Secchi depth (in m) in surface layers. Boxes show the 1<sup>st</sup> and 3<sup>rd</sup> quartile with the median (white line),  
52 whiskers extend to most extreme data point within 1.5 times the IQR from the box.



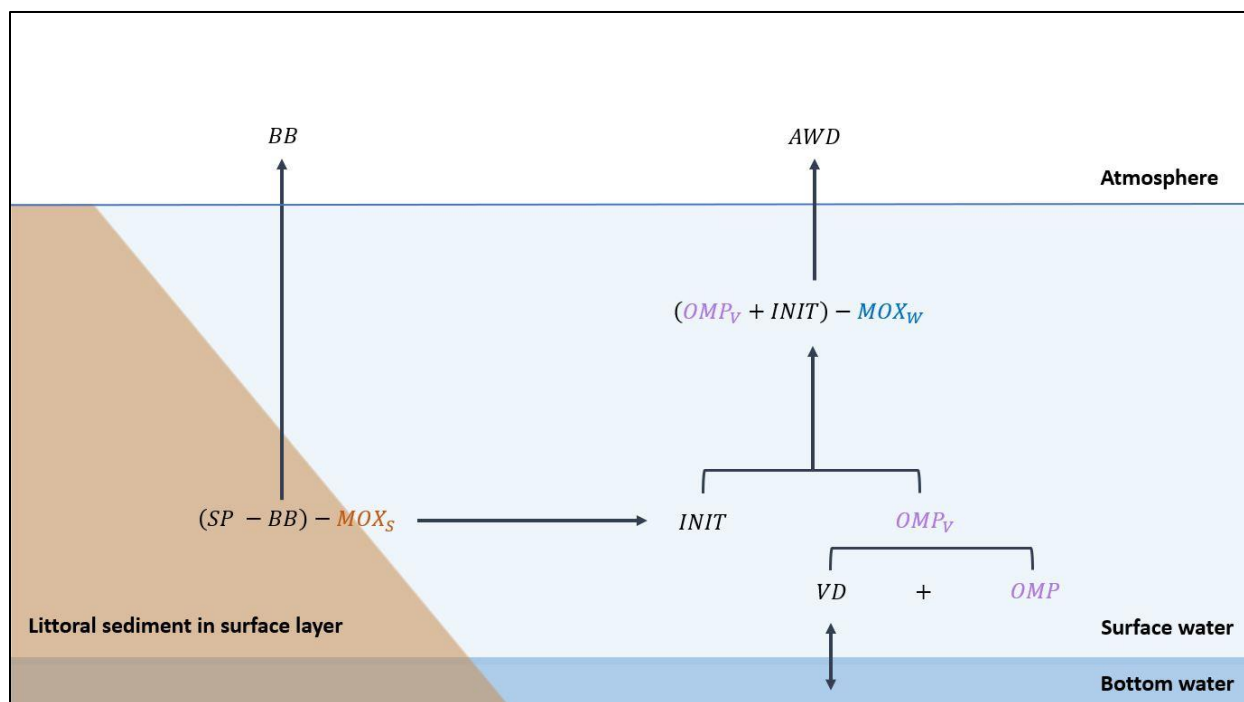

**Supplementary Fig. 7 |** Conceptual schematic of the extended mass balance approach.  $\text{CH}_4$  mass balance components (in  $\text{mol d}^{-1}$ ) in surface water and littoral sediment: sedimentary  $\text{CH}_4$  production (SP), ebullitive  $\text{CH}_4$  emission (BB), air-water diffusive  $\text{CH}_4$  emission to the atmosphere (AWD),  $\text{CH}_4$  oxidized at the sediment-water interface ( $MOX_s$ ),  $\text{CH}_4$  oxidized in surface waters ( $MOX_w$ ),  $\text{CH}_4$  reaching the water column after  $MOX_s$  (INIT), vertical  $\text{CH}_4$  diffusion between surface and bottom water layers (VD), oxic  $\text{CH}_4$  production (OMP), and the net  $\text{CH}_4$  as sum of OMP and VD ( $OMP_v$ ).

## Detailed calculations to derive equation (11) in the extended mass balance approach

In the main context, equations (2) – (10) were then sequentially combined to derive an integrative function of the unknown  $MOX_S$  (i.e., equation (11)) as follows.

In equation (8), isolate the unknown  $\delta^{13}C_{INIT}$ .

### SEq 1

$$\delta^{13}C_{INIT} = \left( \frac{SP - BB - MOX_S}{SP - BB} \right)^{\frac{1-\alpha}{\alpha}} \cdot (\delta^{13}C_{SED} + 1000) - 1000$$

In equation (10),  $frac_{INIT}$  is the fraction of  $INIT$  and defined as  $\frac{INIT}{INIT + OMP_V}$ . Then, substitute equation (7) into this,

### SEq 2

$$frac_{INIT} = \frac{AWD + MOX_w - OMP_V}{AWD + MOX_w}$$

Substitute SEq 1 and SEq 2 into equation (10).

### SEq 3

$$\begin{aligned} \delta^{13}C_{INIT+OMP} = & \left( \frac{AWD + MOX_w - OMP_V}{AWD + MOX_w} \right) \times \left\{ \left( \frac{SP - BB - MOX_S}{SP - BB} \right)^{\frac{1-\alpha}{\alpha}} \cdot (\delta^{13}C_{SED} + 1000) - 1000 \right\} \\ & + \left( \frac{OMP_V}{AWD + MOX_w} \right) \times \delta^{13}C_{OMP_V} \end{aligned}$$

Similarly, in equation (9), isolate the unknown  $\delta^{13}C_{INIT+OMP_V}$ .

### SEq 4

$$\delta^{13}C_{INIT+OMP_V} = \frac{(\delta^{13}C_{SURF} + 1000)}{\left( \frac{OMP_V + INIT - MOX_w}{OMP_V + INIT} \right)^{\frac{1-\alpha}{\alpha}}} - 1000$$

Substitute equation (7) into SEq 4.

79 **SEq 5**

$$80 \quad \delta^{13}C_{INIT+OMP_V} = \frac{(\delta^{13}C_{SURF} + 1000)}{\left(\frac{AWD}{AWD + MOX_w}\right)^{\frac{1-\alpha}{\alpha}}} - 1000$$

81 Let SEq 3 equal SEq 5.

82 **SEq 6**

$$\begin{aligned} 83 \quad & \frac{(\delta^{13}C_{SURF} + 1000)}{\left(\frac{AWD}{AWD + MOX_w}\right)^{\frac{1-\alpha}{\alpha}}} - 1000 \\ 84 \quad & = \left(\frac{AWD + MOX_w - OMP_V}{AWD + MOX_w}\right) \times \left\{ \left(\frac{SP - BB - MOX_S}{SP - BB}\right)^{\frac{1-\alpha}{\alpha}} \cdot (\delta^{13}C_{SED} + 1000) - 1000 \right\} \\ 85 \quad & + \left(\frac{OMP_V}{AWD + MOX_w}\right) \times \delta^{13}C_{OMP_V} \end{aligned}$$

86 Rearrange equation (2) as  $AWD + MOX_w - OMP_V = SP - BB - MOX_S$ . Then, substitute this into SEq 6.

87 **SEq 7**

$$\begin{aligned} 88 \quad & \frac{(\delta^{13}C_{SURF} + 1000)}{\left(\frac{AWD}{AWD + MOX_w}\right)^{\frac{1-\alpha}{\alpha}}} - 1000 \\ 89 \quad & = \left(\frac{SP - BB - MOX_S}{AWD + MOX_w}\right) \times \left\{ \left(\frac{SP - BB - MOX_S}{SP - BB}\right)^{\frac{1-\alpha}{\alpha}} \cdot (\delta^{13}C_{SED} + 1000) - 1000 \right\} \\ 90 \quad & + \left(\frac{OMP_V}{AWD + MOX_w}\right) \times \delta^{13}C_{OMP_V} \end{aligned}$$

91 In SEq 7, isolate the unknown  $OMP_V$ .

92 **SEq 8**

$$\begin{aligned}
 93 \quad OMP_V = & \left[ \frac{\delta^{13}C_{SURF} + 1000}{\left(\frac{AWD}{AWD + MOX_W}\right)^{\frac{1-\alpha}{\alpha}}} - 1000 - \left(\frac{SP - BB - MOX_S}{AWD + MOX_W}\right) \right. \\
 94 \quad & \left. \cdot \left(\frac{SP - BB - MOX_S}{SP - BB}\right)^{\frac{1-\alpha}{\alpha}} \cdot (\delta^{13}C_{SED} + 1000) - 1000 \right] \cdot \frac{AWD + MOX_W}{\delta^{13}C_{OMP_V}}
 \end{aligned}$$

95 Rearrange equation (2) as  $OMP_V = AWD + MOX_W - SP + BB + MOX_S$ . Then, let this equal SEq 8.

96 **SEq 9**

$$\begin{aligned}
 97 \quad AWD + MOX_W - SP + BB + MOX_S \\
 98 \quad = & \left[ \frac{\delta^{13}C_{SURF} + 1000}{\left(\frac{AWD}{AWD + MOX_W}\right)^{\frac{1-\alpha}{\alpha}}} - 1000 - \left(\frac{SP - BB - MOX_S}{AWD + MOX_W}\right) \right. \\
 99 \quad & \left. \cdot \left(\frac{SP - BB - MOX_S}{SP - BB}\right)^{\frac{1-\alpha}{\alpha}} \cdot (\delta^{13}C_{SED} + 1000) - 1000 \right] \cdot \frac{AWD + MOX_W}{\delta^{13}C_{OMP_V}}
 \end{aligned}$$

100 In the left-hand side of SEq 9, move all variables except  $MOX_S$  to the right-hand side. Then, finally it

101 derives an integrative function as equation (11), in which  $MOX_S$  appears on both sides.

102 **SEq 10 (i.e., equation (11) in the main manuscript)**

$$\begin{aligned}
 103 \quad MOX_S = & \left[ \frac{\delta^{13}C_{SURF} + 1000}{\left(\frac{AWD}{AWD + MOX_W}\right)^{\frac{1-\alpha}{\alpha}}} - 1000 - \left(\frac{SP - BB - MOX_S}{AWD + MOX_W}\right) \right. \\
 104 \quad & \left. \cdot \left(\frac{SP - BB - MOX_S}{SP - BB}\right)^{\frac{1-\alpha}{\alpha}} \cdot (\delta^{13}C_{SED} + 1000) - 1000 \right] \cdot \frac{AWD + MOX_W}{\delta^{13}C_{OMP_V}} - AWD - MOX_W \\
 105 \quad & + (SP - BB)
 \end{aligned}$$

106

107 Due to its nonlinear form,  $MOX_S$  can be solved numerically using an iterative method. Lastly, substituting  
108 the calculated  $MOX_S$  into equation (2) yielded  $OMP_V$  as

109 **SEq 11 (i.e., equation (12) in the main manuscript)**

110 
$$OMP_V = AWD - (SP - BB) + MOX_S + MOX_W$$
